# Supplementary material for: Gaps in tropical science arising from biased spatial patterns of sampling and citation
Source: Research Square preprint supplement (doi:10.21203/rs.3.rs-6829857/v1), 2025-06-23
Supplement: Supplementary file 1 [file c60db7f4beab8c134f2dcf51.docx]

**Extended Data**


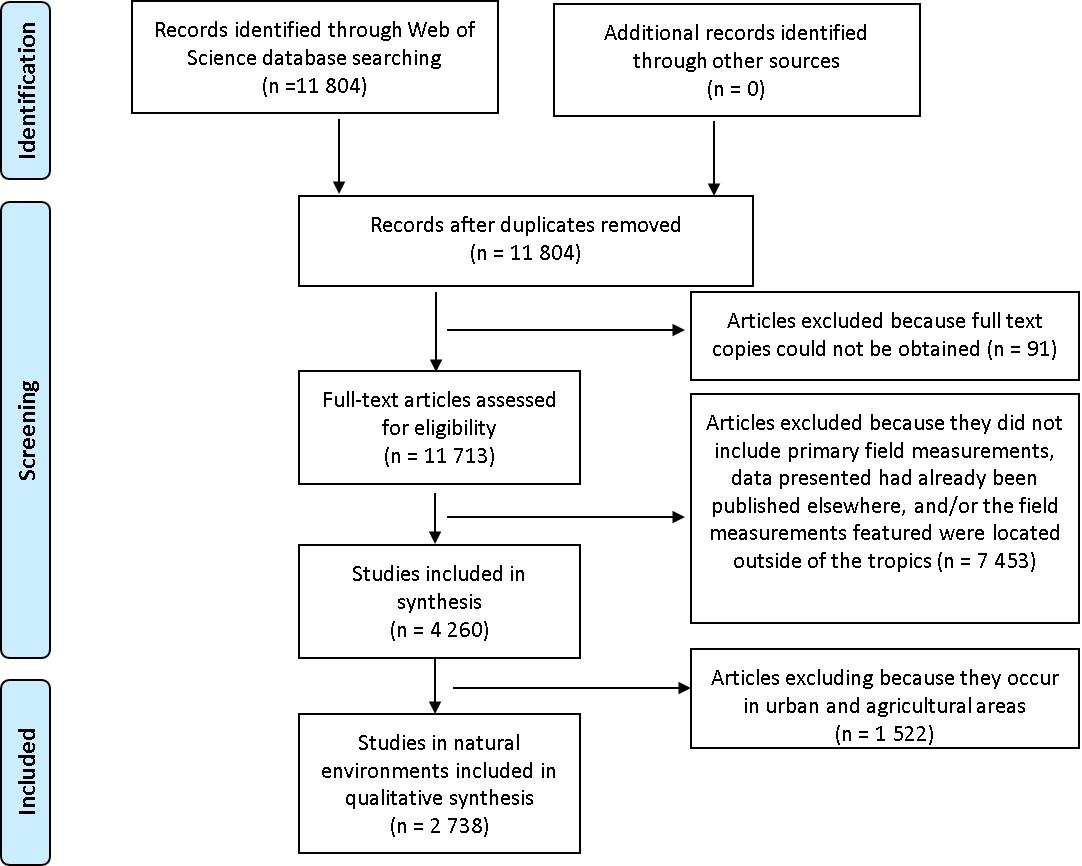


**Extended Data Fig. S1. Flow diagram describing key steps in the literature review.**


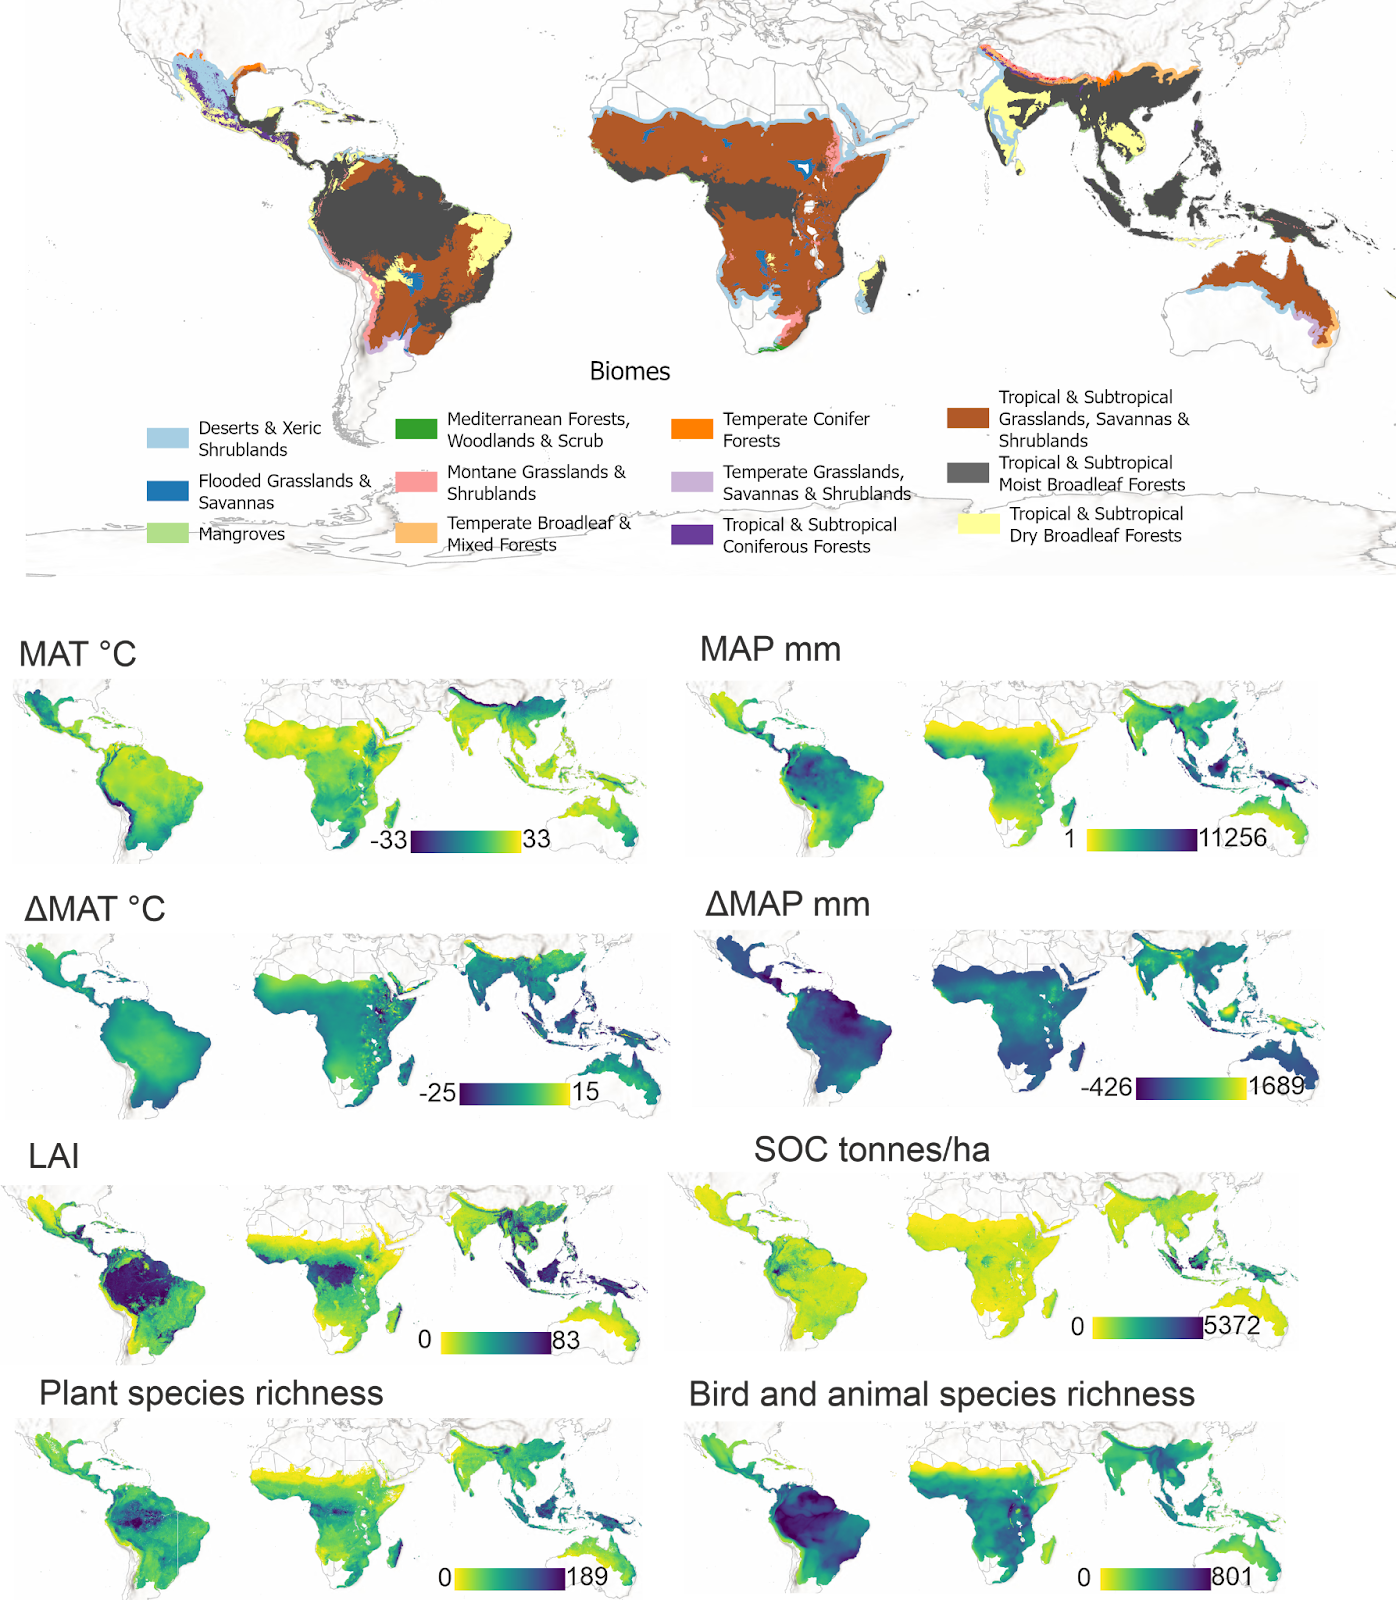


**Extended Data Fig. S2. The tropical biomes27 and environmental conditions used in the study10-14.** Note that in most layers, the minimum and maximum values can be extremely low or high, but these extremes are not widespread across the area. Background maps from ESRI and Natural Earth.

| **Ecoregion** | **Credit** | **Link** |
| --- | --- | --- |
| Guinean mangroves | Julien Saison | https://commons.wikimedia.org/wiki/File:Cueilleuse_traditionnelle_d%27Hu%C3%AEtres_de_mangrove,_delta_du_Sine_Saloum,_femme_du_village_de_Soucouta,_S%C3%A9n%C3%A9gal.jpg |
| Ethiopian montane moorlands | Nina R | https://commons.wikimedia.org/wiki/File:Bale_Mountains_National_Park_(49849653091).jpg |
| Southeast Tibet shrublands and meadows | NoGhost | https://commons.wikimedia.org/wiki/File:Southeast_Tibet_meadows.jpg |
| Marianas tropical dry forests | CT Snow | https://commons.wikimedia.org/wiki/File:Rota_Island_in_the_Commonwealth_of_Northern_Mariana_Islands.jpg |
| Purus-Madeira moist forests | Erick Caldas Xavier | https://commons.wikimedia.org/wiki/File:Floresta_Nacional_do_Iquiri_Erick_Caldas_Xavier_(6).jpg |
| Borneo lowland rain forests | Mike Prince | https://commons.wikimedia.org/wiki/File:Dipterocarp_Forest_at_Danum_Valley_(13997709808).jpg |
| Uatumã-Trombetas moist forests | Ministério da Ciência, Tecnologia e Inovação | https://commons.wikimedia.org/wiki/File:A_(12)_(20932801935).jpg |
| Puerto Rican moist forests | Alessandro Cai | https://commons.wikimedia.org/wiki/File:Rain_Forest_of_El_Yunque,_Puerto_Rico.jpg |
| Jian Nan subtropical evergreen forests | SuTa-mei | https://commons.wikimedia.org/wiki/File:A_forest_scene_of_Xibin_town,Youxi_county.JPG |
| Isthmian-Atlantic moist forests | MongeNajera | https://commons.wikimedia.org/wiki/File:Braulio_Carrillo_National_Park_2.jpg |

**Extended Data Table S1. Details of photographs used in Figure 3.** The photographs were modified from the originals. Use of these photographs does not constitute endorsement by the licensor.
